# Supplementary material for: An Inflammatory Nucleus Pulposus Tissue Culture Model to Test Molecular Regenerative Therapies: Validation with Epigallocatechin 3-Gallate
Source: PubMed Central journal article supplement (PMC5085673; doi:10.3390/ijms17101640), 2016-09-27
Supplement: ijms-17-01640-s001.pdf [file ijms-17-01640-s001.pdf]

# Supplementary Materials: An Inflammatory Nucleus Pulposus Tissue Culture Model to Test Molecular Regenerative Therapies: Validation with Epigallocatechin 3-Gallate

Olga Krupkova, Marian Hlavna, Julie Amir Tahmasseb, Joel Zvick, Dominik Kunz, Keita Ito, Stephen J. Ferguson and Karin Wuertz-Kozak

**Table S1.** Average cycle threshold values (Cq  $\pm$  SD) for all expressed genes in inflammation group. GAPDH, glyceraldehyde-3-phosphate dehydrogenase; MMP, matrix metalloproteinase; IL, interleukin; EGCG, epigallocatechin 3-gallate; TIMP1, tissue inhibitor of matrix metalloproteinases; PTGS2, prostaglandin-endoperoxide synthase 2; ADAMTS, a disintegrin and metalloproteinase with thrombospondin motifs; iNOS, inducible nitric oxide synthase.

| Condition   | Gene              | Mean Cq $\pm$ SD  | Condition           | Gene              | Mean Cq $\pm$ SD  |
|-------------|-------------------|-------------------|---------------------|-------------------|-------------------|
| Control     | <i>S18</i>        | 27.49 $\pm$ 5.12  | IL-1 $\beta$        | <i>S18</i>        | 27.61 $\pm$ 5.19  |
|             | <i>GAPDH</i>      | 27.74 $\pm$ 0.95  |                     | <i>GAPDH</i>      | 27.83 $\pm$ 1.17  |
|             | <i>Collagen 1</i> | 43.46 $\pm$ 3.43  |                     | <i>Collagen 1</i> | 43.38 $\pm$ 3.43  |
|             | <i>Collagen 2</i> | 34.13 $\pm$ 3.29  |                     | <i>Collagen 2</i> | 38.01 $\pm$ 3.55  |
|             | <i>Aggrecan</i>   | 36.14 $\pm$ 3.53  |                     | <i>Aggrecan</i>   | 35.59 $\pm$ 4.35  |
|             | <i>MMP1</i>       | 41.37 $\pm$ 8.87  |                     | <i>MMP1</i>       | 32.51 $\pm$ 12.11 |
|             | <i>MMP3</i>       | 43.61 $\pm$ 2.91  |                     | <i>MMP3</i>       | 32.47 $\pm$ 8.21  |
|             | <i>MMP13</i>      | 37.50 $\pm$ 10.18 |                     | <i>MMP13</i>      | 33.92 $\pm$ 5.44  |
|             | <i>TIMP1</i>      | 35.71 $\pm$ 9.91  |                     | <i>TIMP1</i>      | 31.41 $\pm$ 2.94  |
|             | <i>IL-6</i>       | 45 $\pm$ 0        |                     | <i>IL-6</i>       | 36.35 $\pm$ 4.49  |
|             | <i>IL-8</i>       | 45 $\pm$ 0        |                     | <i>IL-8</i>       | 38.76 $\pm$ 4.12  |
|             | <i>PTGS2</i>      | 43.13 $\pm$ 3.23  |                     | <i>PTGS2</i>      | 37.21 $\pm$ 2.21  |
|             | <i>ADAMTS4</i>    | 45 $\pm$ 0        |                     | <i>ADAMTS4</i>    | 43.57 $\pm$ 2.85  |
| <i>iNOS</i> | 45 $\pm$ 0        | <i>iNOS</i>       | 35.31 $\pm$ 1.54    |                   |                   |
| EGCG        | <i>S18</i>        | 27.69 $\pm$ 4.49  | IL-1 $\beta$ + EGCG | <i>S18</i>        | 27.61 $\pm$ 5.25  |
|             | <i>GAPDH</i>      | 27.91 $\pm$ 0.45  |                     | <i>GAPDH</i>      | 27.84 $\pm$ 1.14  |
|             | <i>Collagen 1</i> | 45 $\pm$ 0        |                     | <i>Collagen 1</i> | 45 $\pm$ 0        |
|             | <i>Collagen 2</i> | 36.62 $\pm$ 5.01  |                     | <i>Collagen 2</i> | 37.86 $\pm$ 4.09  |
|             | <i>Aggrecan</i>   | 36.31 $\pm$ 4.43  |                     | <i>Aggrecan</i>   | 37.01 $\pm$ 3.71  |
|             | <i>MMP1</i>       | 39.28 $\pm$ 11.15 |                     | <i>MMP1</i>       | 37.95 $\pm$ 8.34  |
|             | <i>MMP3</i>       | 40.79 $\pm$ 5.05  |                     | <i>MMP3</i>       | 35.82 $\pm$ 7.13  |
|             | <i>MMP13</i>      | 37.84 $\pm$ 8.86  |                     | <i>MMP13</i>      | 35.23 $\pm$ 8.58  |
|             | <i>TIMP1</i>      | 36.31 $\pm$ 7.25  |                     | <i>TIMP1</i>      | 32.83 $\pm$ 5.05  |
|             | <i>IL-6</i>       | 41.62 $\pm$ 4.65  |                     | <i>IL-6</i>       | 38.06 $\pm$ 3.95  |
|             | <i>IL-8</i>       | 44.41 $\pm$ 1.45  |                     | <i>IL-8</i>       | 42.25 $\pm$ 4.35  |
|             | <i>PTGS2</i>      | 41.67 $\pm$ 3.83  |                     | <i>PTGS2</i>      | 38.94 $\pm$ 2.61  |
|             | <i>ADAMTS4</i>    | 42.76 $\pm$ 4.46  |                     | <i>ADAMTS4</i>    | 43.33 $\pm$ 3.32  |
| <i>iNOS</i> | 42.77 $\pm$ 4.44  | <i>iNOS</i>       | 38.31 $\pm$ 4.57    |                   |                   |
